# Supplementary material for: Suppressors of ipl1-2 in Components of a Glc7 Phosphatase Complex, Cdc48 AAA ATPase, TORC1, and the Kinetochore
Source: PubMed Central journal article supplement (PMC3516489; doi:10.1534/g3.112.003814), 2012-12-01
Supplement: supp_2.12.1687_003814SI.pdf [file supp_2.12.1687_003814SI.pdf]

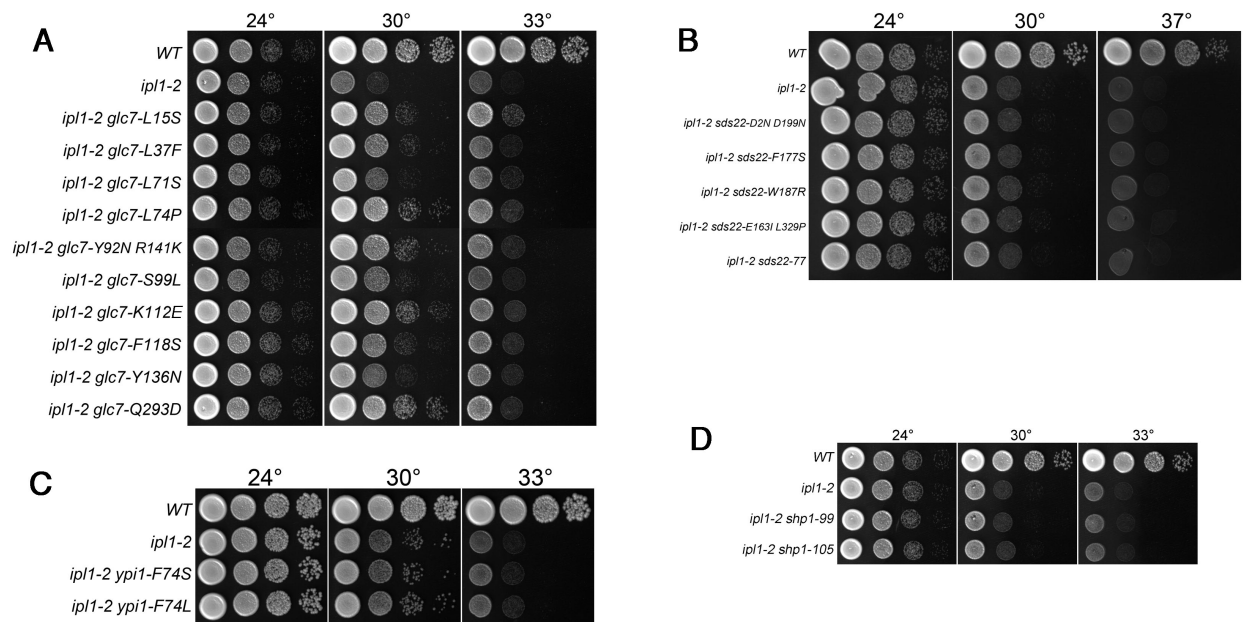

**Figure S1** Dominance of *ipi1* suppressors. Cultures of diploid strains homozygous for *ipi1-2* and heterozygous for the designated *ipi1-2* suppressor mutation were serially diluted onto YPD medium and imaged after 40 hr at the designated temperatures. The WT strain is heterozygous for *ipi1-2* (KT1112 X KT1829). Suppressor mutations in *GLC7*, *SDS22*, *YPI1* and *SHP1* are presented in panels (A), (B), (C), and (D), respectively. Note that only the *GLC7* mutant alleles display semi-dominance.

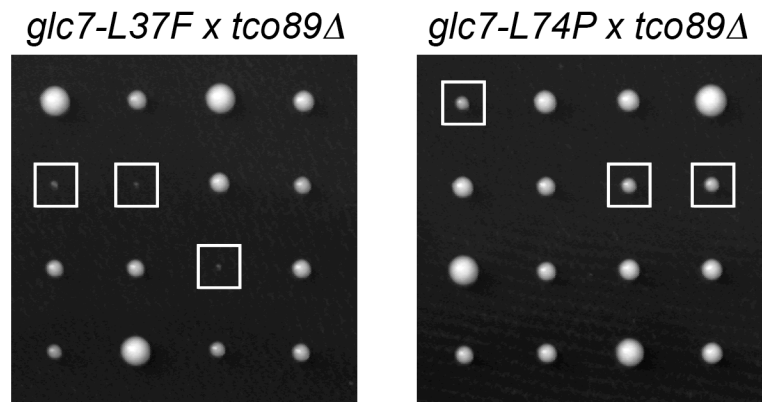

**Figure S2** Genetic interactions between *GLC7* mutant alleles and *TCO89*. Images of four tetrads from a cross between *glc7-L37F* (left panel) and *glc7-L74P* (right panel) and a *tco89Δ::kanMX* strain. The boxes identify the *glc7 tco89Δ* double mutants. Each column represents the four spore clones of a tetrad. Note that the rapamycin-sensitive *GLC7* mutant (*glc7-L37F*) exhibits the strongest genetic interaction with *tco89Δ*.

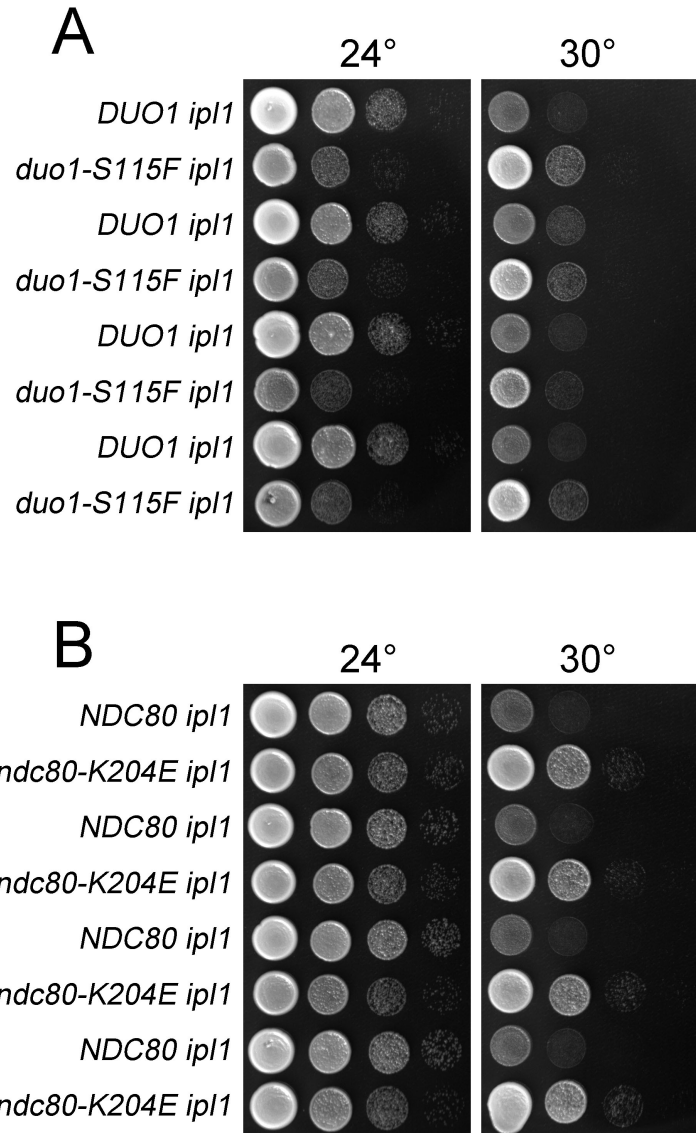

**Figure S3** Confirmation of *duo1-S115F* and *ndc80-K204E* alleles. Cultures of ascospore clones were serially diluted onto YPD medium and imaged after 28-30 hr at the designated temperatures. (A) Haploid spore clones from a diploid strain KT3349 (*ipl1-2/IPL1 duo1Δ::kan/DUO1* pRS303:*duo1-S115F*). All the clones are *ipl1-2* and contain either wild-type *DUO1* or pRS303:*duo1-S115F*. As expected the pRS303-*duo1-S115F* clones are also cold sensitive, arresting as large budded cells at 14°. (B) Haploid spore clones from a diploid strain KT3350 (*ipl1-2/IPL1 ndc80Δ::kan/NDC80* pRS316:*ndc80-K204E*). All the clones are *ipl1-2* and contain either wild-type *NDC80* or pRS316:*ndc80-K204E*.

*ybp2Δ x mad1Δ*

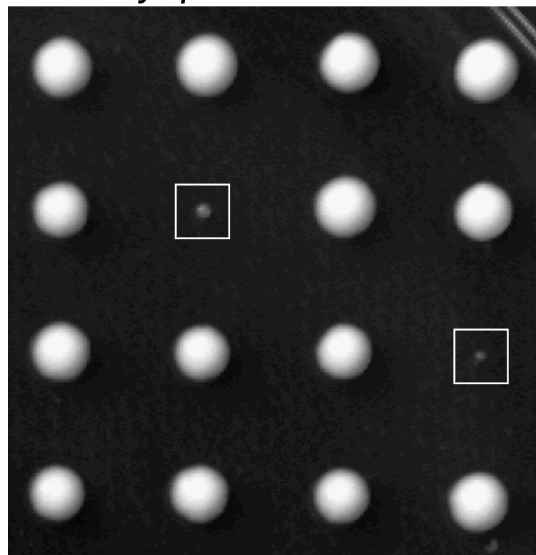

**Figure S4** Genetic interactions between *ybp2Δ* and *mad1Δ* mutant alleles. Images of four tetrads from a cross between *ybp2Δ::kanMX* and a *mad1Δ::HIS3* strain. The boxes identify the *ybp2Δ mad1Δ* double mutants. Each column represents the four spore clones of a tetrad.

**Table S1 Strain list**

| strain | genotype                                                 | Source or reference                         |
|--------|----------------------------------------------------------|---------------------------------------------|
| KT1112 | <i>MATa leu2 ura3 his3</i>                               | (Stuart et al., 1994) <sup>a</sup>          |
| KT1113 | <i>MATα leu2 ura3 his3</i>                               | (Frederick and Tatchell, 1996) <sup>b</sup> |
| KT1687 | <i>MATα mad1::HIS3</i>                                   | this study                                  |
| KT1688 | <i>MATa mad1::HIS3</i>                                   | this study                                  |
| KT1829 | <i>MATα ip11-2 (H352Y)</i>                               | (Hsu et al., 2000) <sup>c</sup>             |
| KT1963 | <i>MATa ip11-2</i>                                       | (Bharucha et al., 2008) <sup>d</sup>        |
| KT2856 | <i>MATa SDS22-mCitrine::SpHis5 POM34-mCherry::SpHis5</i> | this study                                  |
| KT2865 | <i>MATa ip11-R150K H352Y</i>                             | this study                                  |
| KT2867 | <i>MATa ip11-S167L H352Y</i>                             | this study                                  |
| KT2869 | <i>MATa ip11-G347E H352Y</i>                             | this study                                  |
| KT2878 | <i>MATa ip11-2 ndc80-K204E ura3::GFP-TUB1::URA3</i>      | this study                                  |
| KT2881 | <i>MATa YPI1-13Myc:kanMX6</i>                            | this study                                  |
| KT2934 | <i>MATα ip11-2 sds22-D2N D119N</i>                       | this study                                  |
| KT2936 | <i>MATα ip11-2 sds22-77(Cterm frameshift)</i>            | this study                                  |
| KT2938 | <i>MATα ip11-2 glc7-L71S</i>                             | this study                                  |
| KT2939 | <i>MATα ip11-2 glc7-S99L</i>                             | this study                                  |
| KT2940 | <i>MATα ip11-2 glc7-L37F</i>                             | this study                                  |
| KT2963 | <i>MATα sds22-D2N D119N</i>                              | this study                                  |
| KT2964 | <i>MATα sds22-77</i>                                     | this study                                  |
| KT2961 | <i>MATα duo1-S115F (rev76)</i>                           | this study                                  |
| KT2967 | <i>MATα duo1-S115F (rev81)</i>                           | this study                                  |
| KT2969 | <i>MATα glc7-L71S</i>                                    | this study                                  |
| KT2970 | <i>MATα glc7-S99L</i>                                    | this study                                  |
| KT2973 | <i>MATα glc7-L37F</i>                                    | this study                                  |
| KT3052 | <i>MATα ip11-2 sds22-E163I L329P</i>                     | this study                                  |

|        |                                                                          |                                      |
|--------|--------------------------------------------------------------------------|--------------------------------------|
| KT3059 | <i>MATα ipl1-2 glc7-F118S</i>                                            | this study                           |
| KT3062 | <i>MATα ipl1-2 glc7-L15S</i>                                             | this study                           |
| KT3064 | <i>MATα ipl1-2 glc7-K112E</i>                                            | this study                           |
| KT3066 | <i>MATα ipl1-2 glc7-Q293D</i>                                            | this study                           |
| KT3242 | <i>MATα GLC7-mCitrine:SpHis5 POM34-mCherry:SpHis5</i>                    | (Tatchell et al., 2011) <sup>e</sup> |
| KT3255 | <i>MATα ndc80-K204E</i>                                                  | this study                           |
| KT3257 | <i>MATα ipl1-2 ndc80-K204E</i>                                           | this study                           |
| KT3292 | <i>MATα sds22-E163I L329P</i>                                            | this study                           |
| KT3302 | <i>MATα glc7-F118S</i>                                                   | this study                           |
| KT3304 | <i>MATα glc7-L15S</i>                                                    | this study                           |
| KT3308 | <i>MATα glc7-K112E</i>                                                   | this study                           |
| KT3310 | <i>MATα glc7-Q293D</i>                                                   | this study                           |
| KT3317 | <i>MATα PDS1-13Myc:kanMX6 SPC42-3XGFP:TRP1 bar1-1 ndc80-K204E</i>        | this study                           |
| KT3319 | <i>MATα PDS1-13Myc:kanMX6 SPC42-3XGFP:TRP1 bar1-1</i>                    | this study                           |
| KT3320 | <i>MATα PDS1-13Myc:kanMX6 SPC42-3XGFP:TRP1 bar1-1 ndc80-K204E ipl1-2</i> | this study                           |
| KT3351 | <i>MATα sds22-F177S</i>                                                  | this study                           |
| KT3353 | <i>MATα ipl1-2 sds22-F177S</i>                                           | this study                           |
| KT3355 | <i>MATα glc7-Y136N</i>                                                   | this study                           |
| KT3358 | <i>MATα ipl1-2 glc7-Y136N</i>                                            | this study                           |
| KT3359 | <i>MATα glc7-L74P</i>                                                    | this study                           |
| KT3361 | <i>MATα ipl1-2 glc7-L74P</i>                                             | this study                           |
| KT3363 | <i>MATα glc7-Y92N R141K</i>                                              | this study                           |
| KT3365 | <i>MATα ipl1-2 glc7-Y92N R141K</i>                                       | this study                           |
| KT3368 | <i>MATα ipl1-2 ypi1-F74S</i>                                             | this study                           |
| KT3370 | <i>MATα ipl1-2 ypi1-F74L</i>                                             | this study                           |
| KT3381 | <i>MATα ipl1-2 sds22-W187R</i>                                           | this study                           |
| KT3383 | <i>MATα IPL1-13Myc:kanMX6</i>                                            | this study                           |

|        |                                                                                                                      |            |
|--------|----------------------------------------------------------------------------------------------------------------------|------------|
| KT3385 | <i>MAT<math>\alpha</math> duo1-S115F</i>                                                                             | this study |
| KT3386 | <i>MAT<math>\alpha</math> ipl1-2 duo1-S115F</i>                                                                      | this study |
| KT3389 | <i>MAT<math>\alpha</math> IPL1-13Myc:kanMX6 tco89-71</i>                                                             | this study |
| KT3391 | <i>MAT<math>\alpha</math> IPL1-13Myc:kanMX6 glc7-L74P</i>                                                            | this study |
| KT3392 | <i>MAT<math>\alpha</math> IPL1-13Myc:kanMX6 glc7-Y92N R141K</i>                                                      | this study |
| KT3395 | <i>MAT<math>\alpha</math> IPL1-13Myc:kanMX6 shp1-105</i>                                                             | this study |
| KT3396 | <i>MAT<math>\alpha</math> IPL1-13Myc:kanMX6 shp1-99</i>                                                              | this study |
| KT3400 | <i>MAT<math>\alpha</math> ipl1-2 ybp2<math>\Delta</math>::kanMX6</i>                                                 | this study |
| KT3401 | <i>MAT<math>\alpha</math> ipl1-2 ybp2<math>\Delta</math>::kanMX6</i>                                                 | this study |
| KT3403 | <i>MAT<math>\alpha</math> ybp2<math>\Delta</math>::kanMX6</i>                                                        | this study |
| KT3409 | <i>MAT<math>\alpha</math> ipl1-2 duo1-S115F ybp2<math>\Delta</math>::kanMX6</i>                                      | this study |
| KT3410 | <i>MAT<math>\alpha</math> duo1-S115F ybp2<math>\Delta</math>::kanMX6</i>                                             | this study |
| KT3412 | <i>MAT<math>\alpha</math> shp1-99</i>                                                                                | this study |
| KT3413 | <i>MAT<math>\alpha</math> shp1-99 ipl1-2</i>                                                                         | this study |
| KT3415 | <i>MAT<math>\alpha</math> shp1-99 ipl1-2</i>                                                                         | this study |
| KT3416 | <i>MAT<math>\alpha</math> shp1-105</i>                                                                               | this study |
| KT3417 | <i>MAT<math>\alpha</math> shp1-105 ipl1-2</i>                                                                        | this study |
| KT3419 | <i>MAT<math>\alpha</math> shp1-105 ipl1-2</i>                                                                        | this study |
| KT3424 | <i>MAT<math>\alpha</math> GLC7-mCitrine:SpHis5 POM34-mCitrine:SpHis5 ipl1-2 shp1-105</i>                             | this study |
| KT3247 | <i>MAT<math>\alpha</math> YPI1-13Myc:kanMX6 ipl1-2 shp1-105</i>                                                      | this study |
| KT3428 | <i>MAT<math>\alpha</math> SDS22-mCitrine:SpHis5 POM34-mCherry:SpHis5 ipl1-2 shp1-105</i>                             | this study |
| KT3449 | <i>MAT<math>\alpha</math>/MAT<math>\alpha</math> ipl1-2/IPL1 duo1<math>\Delta</math>::kanMX6 pRS306:duo1-S115F</i>   | this study |
| KT3450 | <i>MAT<math>\alpha</math>/MAT<math>\alpha</math> ipl1-2/IPL1 ndc80<math>\Delta</math>::kanMX6 pRS313:ndc80-K204E</i> | this study |

<sup>a</sup>Stuart, J.S., Frederick, D.L., Varner, C.M., and Tatchell, K. (1994). The mutant type 1 protein phosphatase encoded by *glc7-1* from *Saccharomyces cerevisiae* fails to interact productively with the *GAC1*-encoded regulatory subunit. *Mol Cell Biol* **14**, 896-905.

<sup>b</sup>Frederick, D.L., and Tatchell, K. (1996). The *REG2* gene of *Saccharomyces cerevisiae* encodes a type1 protein phosphatase-binding protein that functions with Reg1p and the Snf1p protein kinase to regulate growth. *Mol Cell Biol* **16**, 2922-2931.

<sup>c</sup> Hsu, J.-Y., Sun, Z.-W., Li, X., Ruben, M., Tatchell, K., Bishop, D.K., Grushcow, J.M., Brame, C.J., Caldwell, J.A., Hunt, D.F., *et al.* (2000). Mitotic phosphorylation of histone H3 is governed by Ipl1/aurora kinase and Glc7p/PP1 phosphatase in budding yeast and nematodes. *Cell* *102*, 279-291.

<sup>d</sup> Bharucha, J.P., Larson, J.R., Gao, L., Daves, L.K., and Tatchell, K. (2008). Ypi1, a Positive Regulator of Nuclear Protein Phosphatase Type 1 Activity in *Saccharomyces cerevisiae*. *Mol Biol Cell* *19*, 1032-1045.

<sup>e</sup> Tatchell, K., Makrantonis, V., Stark, M.J., and Robinson, L.C. (2011). Temperature-sensitive ipl1-2/Aurora B mutation is suppressed by mutations in TOR complex 1 via the Glc7/PP1 phosphatase. *Proc Natl Acad Sci U S A* *108*, 3994-3999.



**Table S2 Primers Used**

| <b>PRIMER</b> | <b>SEQUENCE, 5' - 3'</b>  |
|---------------|---------------------------|
| pBR-247F      | GATGCAATTTCTATGCGCAC      |
| pBR-559R      | CAAGGAATGGTGCATGCAAG      |
| DUO1-F        | GATGAGAGGTTTTGGACCTC      |
| DUO1-R        | CCTGTTGAAACTAAGGCATG      |
| DUO1-Fa       | CCTGCTCGTTGTACATATC       |
| DUO1-Ra       | CAACCTGTAGCCGTATTAAG      |
| GLC7-F        | CGTAACACAAGTTAACACC       |
| GLC7-R        | GAGTGATGATTGCATCTTCC      |
| IPL1-F        | GCAATTGCTCAAGTGAATG       |
| IPL1-R        | GCAATATACGATGCCGAAAAG     |
| IPL1-SEQ      | CGCTAAATCATCCGAATC        |
| NDC80-F       | GAATACATTCACAGGAGAGG      |
| NDC80-R       | GGTGAATTGAACAAAATGC       |
| NDC80-1644F   | CTGTAGGTGGCTCTAATTG       |
| NDC80-Fa      | CTGGATCCCAGATGGTTATAACTG  |
| NDC80-Ra      | CTTCTAGACCACCGTCTTCTTATTC |
| SDS22-F       | CTCTCTCCTCCCTTTTTCTC      |
| SDS22-R       | GCGAACTTTAACTAGATGG       |
| SHP1-F        | GTGGACAGCTTAGTTAAGAC      |
| SHP1-R        | CTGCTCCAAAAGCAGTATTG      |

|           |                                                                 |
|-----------|-----------------------------------------------------------------|
| SHP1-303F | CAAGGTAGCAACGAGTACTTG                                           |
| YBP2-F    | CGTTTCGCTGTGAAACTAAC                                            |
| YBP2-R    | CGTACTTTCTGGGTTCCAATG                                           |
| YBP2-571F | GTAACAACCAACGTTCAAGG                                            |
| YPI1-F    | CCGTTTCTTAGCTTAAAGGC                                            |
| YPI1-R    | CAATACAGAATGCCAAGGG                                             |
| IPL1-F2   | GATACTAAGAAACAAGCCCTTTTGGGAAAATAAGCGTTACGGATCCCCGGGTTAATTAA     |
| IPL1-R1   | ATTAATAGTGCCCTTCAAACGATTCTGTCATACTTTAATTGAATTCGAGCTCGTTTAAAC    |
| NDC80-F2  | GTTACGAAATTTGGAGTTTGAAACTGAACATAACGTAACAAATCGGATCCCCGGGTTAATTAA |
| NDC80-R1  | CTTTGCTGTAGATTGCTCGGGTATTATATATCATTATTTTAGAATTCGAGCTCGTTTAAAC   |
| PDS1-F2   | AGAAGGCCTCGATCCTGAAGAACTAGAGGACTTAGTTACTCGGATCCCCGGGTTAATTAA    |
| PDS1-R1   | ACGTGTATATATGTTGTGTGTATGTGAATGAGCAGTGGATGAATTCGAGCTCGTTTAAAC    |
| SHP1-F2   | CGCTGATCTGCTGAACTCCGTTGTCGTGCAAAGATGGGCACGGATCCCCGGGTTAATTAA    |
| SHP1-R1   | GTTGAAGTCTTTTCCGTTTCTGTTTTGTATATTTATGCGAATTCGAGCTCGTTTAAAC      |

---
