# Supplementary material for: Suppressors of ipl1-2 in Components of a Glc7 Phosphatase Complex, Cdc48 AAA ATPase, TORC1, and the Kinetochore
Source: PubMed Central journal article supplement (PMC3516489; doi:10.1534/g3.112.003814), 2012-12-01
Supplement: supp_2.12.1687_FigureS4.pdf [file supp_2.12.1687_FigureS4.pdf]

*ybp2Δ x mad1Δ*

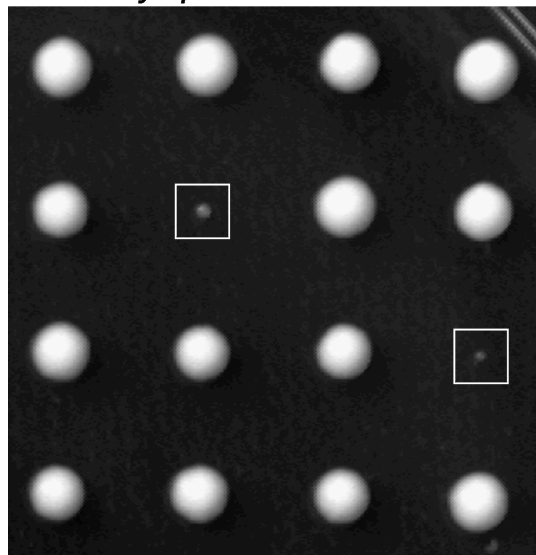

**Figure S4** Genetic interactions between *ybp2Δ* and *mad1Δ* mutant alleles. Images of four tetrads from a cross between *ybp2Δ::kanMX* and a *mad1Δ::HIS3* strain. The boxes identify the *ybp2Δ mad1Δ* double mutants. Each column represents the four spore clones of a tetrad.
